# Supplementary material for: Genetic stability, environmental safety and field adaptation assessment of transgenic rice with chicken Newcastle disease HN protein
Source: Research Square preprint supplement (doi:10.21203/rs.3.rs-7453085/v1), 2025-10-29
Supplement: Supplementary file 1 [file 0dfa972db560efb4f7a25022.docx]

**Table 1-1 Primers used to amplify HN and HygR gene**

| **primer** | **primer sequence（5′-3′）** |
| --- | --- |
| HN-F | ACGACACCCAGAACCGCAAGA |
| HN-R | CGTAGACCGGGAACCAGACG |
| HygR-F | CTTCTGCGGGCGATTT |
| HygR-R | ACTGGAGCGAGGCGATG |

**Table 1-2 PCR reaction system（50µL）**

| **Reaction system** | **volumes（50µL）** |
| --- | --- |
| 2xRapid Taq master mix (P222-01,Vazyme) | 25µL |
| ddH2O | Add to 50µL |
| HN-F | 1µL |
| HN-R | 1µL |
| cDNA | 2µL |

**Table 1-3 qPCR reaction system（20µL）**

| **Reaction system** | **volumes（20µL）** |
| --- | --- |
| 2xChamQ Universal SYBR qPCR Master Mix | 10µL |
| ddH2O | Add to 20µL |
| HN-F | 0.4µL |
| HN-R | 0.4µL |
| cDNA | 2µL |
